# Supplementary material
Source: Springer Nature journal article supplement (https://www.springermedizin.de/resource/supplementary/12936_2009_1189_MOESM3_ESM.pdf/9549180)
Supplement: MOESM3 [file 9549180]

■ Density 1 by microscopy 
 ■ Density 2 by microscopy 
 ■ Density 3 by microscopy 
 ■ Density 4 or 5 by microscopy

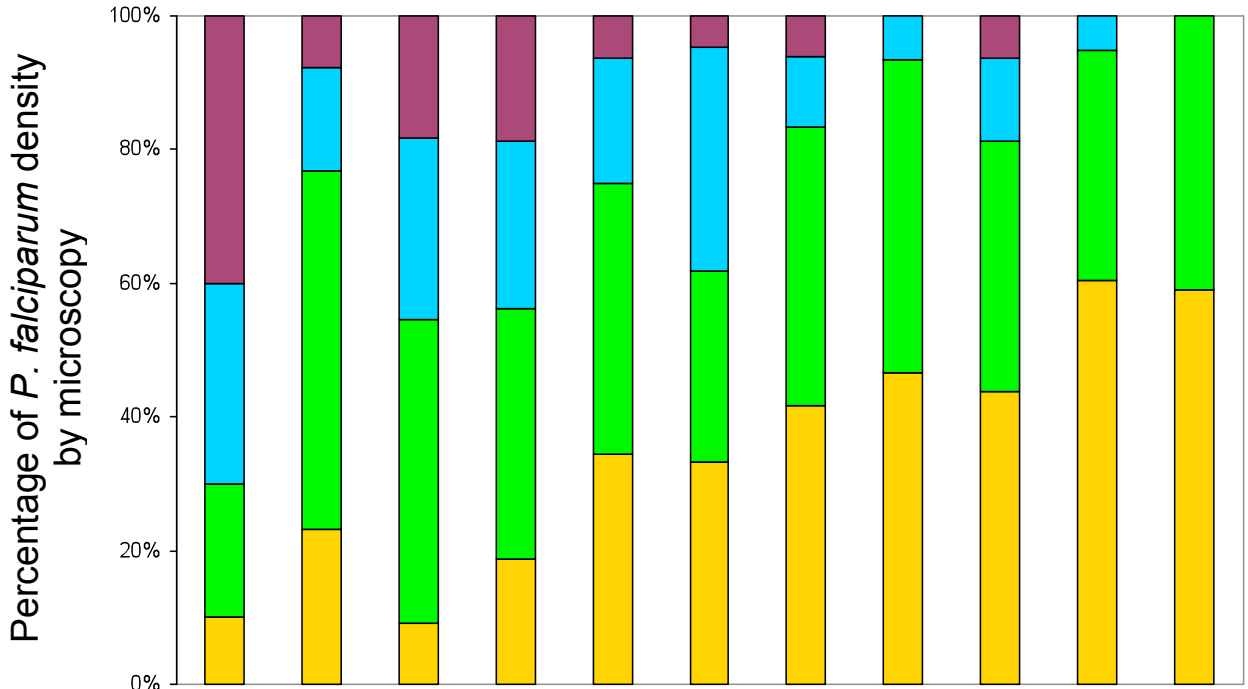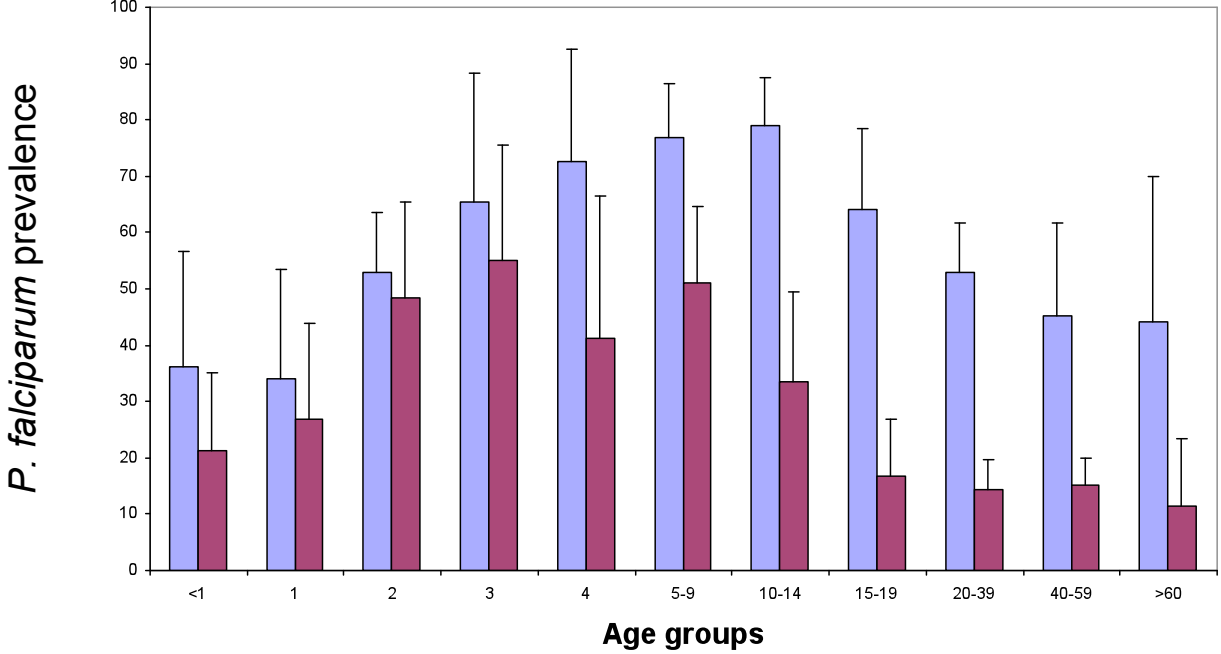

■ *P. falciparum* detected by RFLP-dHPLC 
 ■ *P. falciparum* detected by microscopy
